# Supplementary material
Source: publisher figshare collection journal article supplement (https://tandf.figshare.com/ndownloader/files/22789190)
Supplement: Supplementary file 1 [file 22789190]

**Synthesis, X-ray analysis and computational studies of two novel thiophene derivatives**

**Abdullatif Bin Muhsinaha, Abdulrhman Asayaria, H. Algarnib,c Saied M. Soliman,d,e Nabila A. Khederf, Hazem A. Ghabbourg, Yahya I Asirih , Kumar Venkatesani andYahia N. Mabkhoti,***

aDepartment of Pharmacognosy, College of Pharmacy, King Khalid University, Abha, Saudi Arabia.

bDepartment of Physics, Faculty of Sciences, King Khalid University, P. O. Box 9004, Abha, Saudi Arabia.
cResearch Centre for Advanced Materials Science (RCAMS), King Khalid University, Abha, P. O. Box 9004, Saudi Arabia.

dDepartment of Chemistry, Faculty of Science, Alexandria University, P.O. Box 426, Ibrahimia 21321, Alexandria, Egypt.

eDepartment of Chemistry, Rabigh College of Science and Art, King Abdulaziz University, Saudi Arabia

fDepartment of Chemistry, Faculty of Science, Cairo University, Giza 12613, Egypt.

gDepartment of Medicinal Chemistry, Faculty of Pharmacy, University of Mansoura, Mansoura 35516, Egypt.

hDepartment of Pharmacology, College of Pharmacy, King Khalid University, Abha. Saudi Arabia.

iDepartment of Pharmaceutical Chemistry, College of Pharmacy, King Khalid University, Abha. Saudi Arabia.

| 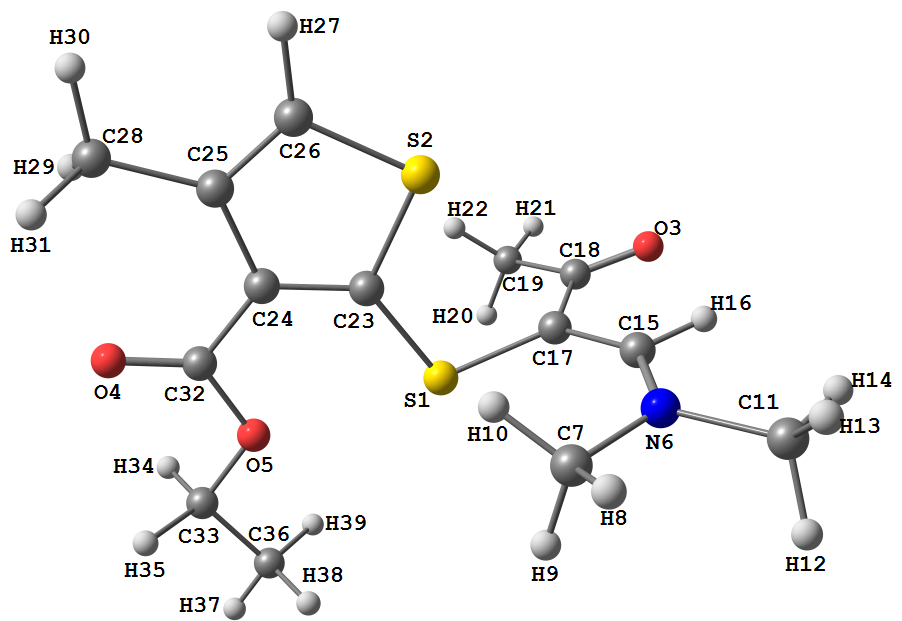 | 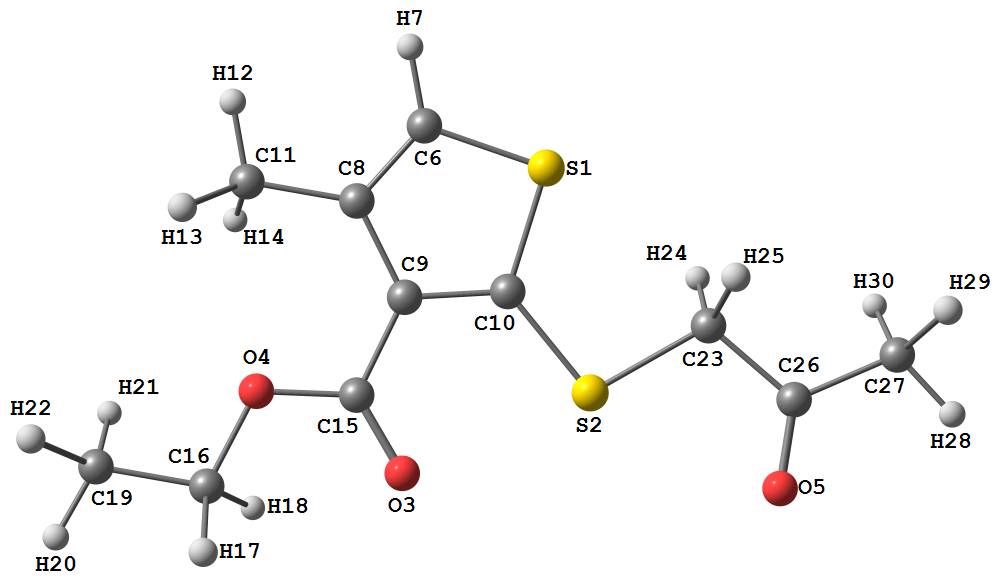 |
| --- | --- |
| **Compound 8** | **Compound 7** |

**Fig. S1.** Optimized structures of compounds **7** and **8**.

| 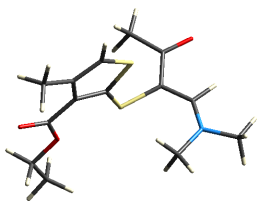 | 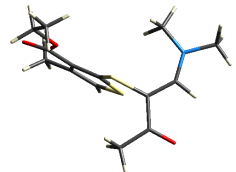 | 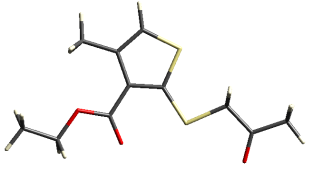 | 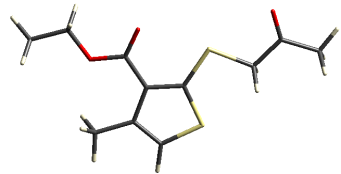 |  |
| --- | --- | --- | --- | --- |
| 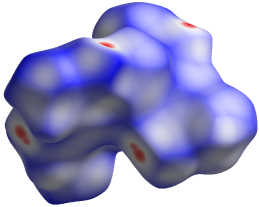 | 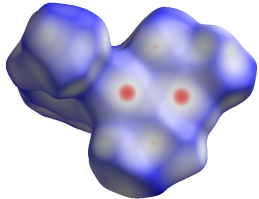 | 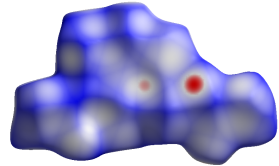 | 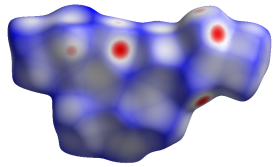 | **A** |
| 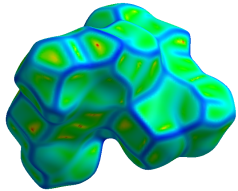 | 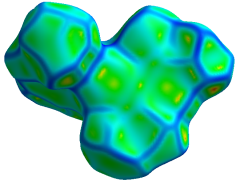 | 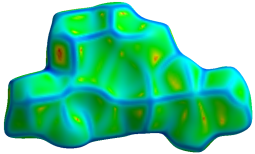 | 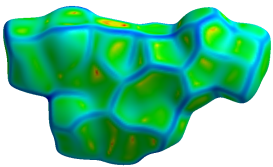 | **B** |
| 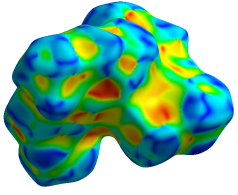 | 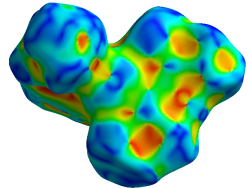 | 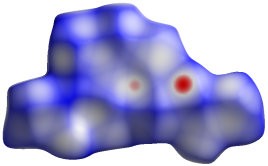 | 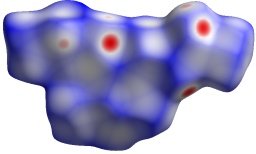 | **C** |
|  | **7** |  | **8** |  |

**Fig. S2.** Hirshfeld surfaces of compounds **7** and **8** mapped over A) dnorm, B) curvedness and C) shape index.

**Table S1. The crystal and experimental data of compounds 7** and **8**

| **Crystal data** | **7** | **8** |
| --- | --- | --- |
| Chemical formula | [C11H14O3S2](file:///C:\Users\ygaber\Downloads\a%20_chemical_formula_sum) | [C14H19NO3S2](file:///C:\Users\ygaber\Downloads\a_a%20_chemical_formula_sum) |
| *M*r | [258.34](file:///C:\Users\ygaber\Downloads\a%20_chemical_formula_weight) | [313.42](file:///C:\Users\ygaber\Downloads\a_a%20_chemical_formula_weight) |
| Crystal system, space group | [Monoclinic](file:///C:\Users\ygaber\Downloads\a%20_symmetry_cell_setting), [*P*21/*c*](file:///C:\Users\ygaber\Downloads\a%20_symmetry_space_group_name_H-M) | [Triclinic](file:///C:\Users\ygaber\Downloads\a_a%20_symmetry_cell_setting), [*P*](file:///C:\Users\ygaber\Downloads\a_a%20_symmetry_space_group_name_H-M)-1 |
| Temperature (K) | [296](file:///C:\Users\ygaber\Downloads\a%20_cell_measurement_temperature) | [296](file:///C:\Users\ygaber\Downloads\a_a%20_cell_measurement_temperature) |
| *a*, *b*, *c* (Å) | [5.6444 (2)](file:///C:\Users\ygaber\Downloads\a%20_cell_length_a), [26.9651 (8)](file:///C:\Users\ygaber\Downloads\a%20_cell_length_b), [8.0007 (2)](file:///C:\Users\ygaber\Downloads\a%20_cell_length_c) | [8.5051 (4)](file:///C:\Users\ygaber\Downloads\a_a%20_cell_length_a), [8.7406 (4)](file:///C:\Users\ygaber\Downloads\a_a%20_cell_length_b), [11.4925 (5)](file:///C:\Users\ygaber\Downloads\a_a%20_cell_length_c) |
| α, β, γ (°) | 90.0, [104.973 (1)](file:///C:\Users\ygaber\Downloads\a%20_cell_angle_beta), 90.0 | [77.363 (1)](file:///C:\Users\ygaber\Downloads\a_a%20_cell_angle_alpha), [68.514 (1)](file:///C:\Users\ygaber\Downloads\a_a%20_cell_angle_beta), [73.415 (2)](file:///C:\Users\ygaber\Downloads\a_a%20_cell_angle_gamma) |
| V (Å3) | [1176.38 (6)](file:///C:\Users\ygaber\Downloads\a%20_cell_volume) | [755.63 (6)](file:///C:\Users\ygaber\Downloads\a_a%20_cell_volume) |
| *Z* | [4](file:///C:\Users\ygaber\Downloads\a%20_cell_formula_units_Z) | [2](file:///C:\Users\ygaber\Downloads\a_a%20_cell_formula_units_Z) |
| Radiation type | [Mo *K*α](file:///C:\Users\ygaber\Downloads\a%20_diffrn_radiation_type) | [Mo *K*α](file:///C:\Users\ygaber\Downloads\a_a%20_diffrn_radiation_type) |
| µ (mm−1) | [0.44](file:///C:\Users\ygaber\Downloads\a%20_exptl_absorpt_coefficient_mu) | [0.36](file:///C:\Users\ygaber\Downloads\a_a%20_exptl_absorpt_coefficient_mu) |
| Crystal size (mm) | [0.69](file:///C:\Users\ygaber\Downloads\a%20_exptl_crystal_size_max) × [0.21](file:///C:\Users\ygaber\Downloads\a%20_exptl_crystal_size_mid) × [0.18](file:///C:\Users\ygaber\Downloads\a%20_exptl_crystal_size_min) | [0.70](file:///C:\Users\ygaber\Downloads\a_a%20_exptl_crystal_size_max) × [0.51](file:///C:\Users\ygaber\Downloads\a_a%20_exptl_crystal_size_mid) × [0.19](file:///C:\Users\ygaber\Downloads\a_a%20_exptl_crystal_size_min) |
| **Data collection** | | |
| Diffractometer | [Bruker APEX-II D8 venture  diffractometer](file:///C:\Users\ygaber\Downloads\a_a%20_diffrn_measurement_device_type) | [Bruker APEX-II D8 venture  diffractometer](file:///C:\Users\ygaber\Downloads\a_a%20_diffrn_measurement_device_type) |
| Absorption correction | [Multi-scan](file:///C:\Users\ygaber\Downloads\a_a%20_exptl_absorpt_correction_type) [SADABS Bruker 2014](file:///C:\Users\ygaber\Downloads\a_a%20_exptl_absorpt_process_details) | [Multi-scan](file:///C:\Users\ygaber\Downloads\a_a%20_exptl_absorpt_correction_type) [SADABS Bruker 2014](file:///C:\Users\ygaber\Downloads\a_a%20_exptl_absorpt_process_details) |
| Tmin, Tmax | [0.751](file:///C:\Users\ygaber\Downloads\a%20_exptl_absorpt_correction_T_min), [0.923](file:///C:\Users\ygaber\Downloads\a%20_exptl_absorpt_correction_T_max) | [0.788](file:///C:\Users\ygaber\Downloads\a_a%20_exptl_absorpt_correction_T_min), [0.936](file:///C:\Users\ygaber\Downloads\a_a%20_exptl_absorpt_correction_T_max) |
| No. of measured, independent and observed [[I](file:///C:\Users\ygaber\Downloads\a_a%20_reflns_threshold_expression) [> 2σ(I)](file:///C:\Users\ygaber\Downloads\a_a%20_reflns_threshold_expression)] reflections | [37967](file:///C:\Users\ygaber\Downloads\a%20_diffrn_reflns_number), [4491](file:///C:\Users\ygaber\Downloads\a%20_reflns_number_total), [4016](file:///C:\Users\ygaber\Downloads\a%20_reflns_number_gt) | [11701](file:///C:\Users\ygaber\Downloads\a_a%20_diffrn_reflns_number), [2658](file:///C:\Users\ygaber\Downloads\a_a%20_reflns_number_total), [2367](file:///C:\Users\ygaber\Downloads\a_a%20_reflns_number_gt) |
| Rint | [0.030](file:///C:\Users\ygaber\Downloads\a%20_diffrn_reflns_av_R_equivalents) | [0.071](file:///C:\Users\ygaber\Downloads\a_a%20_diffrn_reflns_av_R_equivalents) |
| **Refinement** | | |
| R[*F2*> 2σ( *F2*)], wR( *F2*), S | [0.028](file:///C:\Users\ygaber\Downloads\a%20_refine_ls_R_factor_gt), [0.072](file:///C:\Users\ygaber\Downloads\a%20_refine_ls_wR_factor_ref), [1.04](file:///C:\Users\ygaber\Downloads\a%20_refine_ls_goodness_of_fit_ref) | [0.080](file:///C:\Users\ygaber\Downloads\a_a%20_refine_ls_R_factor_gt), [0.223](file:///C:\Users\ygaber\Downloads\a_a%20_refine_ls_wR_factor_ref), [1.15](file:///C:\Users\ygaber\Downloads\a_a%20_refine_ls_goodness_of_fit_ref) |
| No. of reflections | [4491](file:///C:\Users\ygaber\Downloads\a%20_refine_ls_number_reflns) | [2658](file:///C:\Users\ygaber\Downloads\a_a%20_refine_ls_number_reflns) |
| No. of parameters | [148](file:///C:\Users\ygaber\Downloads\a%20_refine_ls_number_parameters) | [176](file:///C:\Users\ygaber\Downloads\a_a%20_refine_ls_number_parameters) |
| H-atom treatment | [H atoms treated by a mixture of independent and constrained refinement](file:///C:\Users\ygaber\Downloads\a%20_refine_ls_hydrogen_treatment) | [H atoms treated by a mixture of independent and constrained refinement](file:///C:\Users\ygaber\Downloads\a_a%20_refine_ls_hydrogen_treatment) |
| Δρmax, Δρmin (e Å−3) | [0.45](file:///C:\Users\ygaber\Downloads\a%20_refine_diff_density_max), [−0.35](file:///C:\Users\ygaber\Downloads\a%20_refine_diff_density_min) | [0.96](file:///C:\Users\ygaber\Downloads\a_a%20_refine_diff_density_max), [−1.33](file:///C:\Users\ygaber\Downloads\a_a%20_refine_diff_density_min) |
| CCDC number | 1551320 | 1555388 |

**Table S2.** Experimental and calculated geometric parameters (Å, º) of compounds **7** and **8**.

| **Compound 8** | **Calc** | **exp** | **Compound 7** | **calc** | **exp** |
| --- | --- | --- | --- | --- | --- |
| R(1-17) | 1.783 | 1.765 | R(1-6) | 1.740 | 1.722 |
| R(1-23) | 1.778 | 1.762 | R(1-10) | 1.745 | 1.724 |
| R(2-23) | 1.744 | 1.721 | R(2-10) | 1.763 | 1.747 |
| R(2-26) | 1.740 | 1.724 | R(2-23) | 1.835 | 1.809 |
| R(3-18) | 1.229 | 1.231 | R(3-15) | 1.221 | 1.219 |
| R(4-32) | 1.219 | 1.209 | R(4-15) | 1.354 | 1.341 |
| R(5-32) | 1.356 | 1.349 | R(4-16) | 1.446 | 1.453 |
| R(5-33) | 1.445 | 1.446 | R(5-26) | 1.214 | 1.217 |
| R(6-7) | 1.461 | 1.471 | R(6-8) | 1.363 | 1.362 |
| R(6-11) | 1.460 | 1.464 | R(8-9) | 1.450 | 1.447 |
| R(6-15) | 1.344 | 1.319 | R(8-11) | 1.506 | 1.502 |
| R(15-17) | 1.380 | 1.378 | R(9-10) | 1.393 | 1.392 |
| R(17-18) | 1.491 | 1.470 | R(9-15) | 1.470 | 1.467 |
| R(18-19) | 1.519 | 1.505 | R(16-19) | 1.516 | 1.505 |
| R(23-24) | 1.391 | 1.395 | R(23-26) | 1.526 | 1.510 |
| R(24-25) | 1.452 | 1.445 | R(26-27) | 1.517 | 1.503 |
| R(24-32) | 1.474 | 1.465 | A(6-1-10) | 91.8 | 92.1 |
| R(25-26) | 1.363 | 1.358 | A(1-6-8) | 112.8 | 113.0 |
| R(25-28) | 1.505 | 1.503 | A(1-10-2) | 123.6 | 122.9 |
| R(33-36) | 1.516 | 1.505 | A(1-10-9) | 110.5 | 110.8 |
| R(3-16) | 2.190 | 2.264 | A(10-2-23) | 99.5 | 99.7 |
| A(17-1-23) | 103.1 | 102.3 | A(2-10-9) | 125.9 | 126.3 |
| A(1-17-15) | 125.2 | 124.2 | A(2-23-26) | 109.6 | 110.0 |
| A(1-17-18) | 119.8 | 120.1 | A(3-15-4) | 122.4 | 122.9 |
| A(1-23-2) | 120.1 | 119.8 | A(3-15-9) | 123.7 | 123.6 |
| A(1-23-24) | 128.9 | 129.0 | A(15-4-16) | 115.4 | 115.6 |
| A(23-2-26) | 91.4 | 91.7 | A(4-15-9) | 113.9 | 113.5 |
| A(2-23-24) | 111.0 | 111.2 | A(4-16-19) | 107.6 | 107.0 |
| A(2-26-25) | 113.1 | 113.3 | A(5-26-23) | 121.9 | 121.6 |
| A(3-18-17) | 121.2 | 121.7 | A(5-26-27) | 122.4 | 123.3 |
| A(3-18-19) | 119.8 | 118.8 | A(6-8-9) | 111.7 | 111.3 |
| A(4-32-5) | 122.3 | 122.9 | A(6-8-11) | 122.0 | 122.2 |
| A(4-32-24) | 125.1 | 125.0 | A(9-8-11) | 126.3 | 126.5 |
| A(32-5-33) | 115.8 | 115.0 | A(8-9-10) | 113.2 | 112.8 |
| A(5-32-24) | 112.5 | 112.1 | A(8-9-15) | 127.5 | 127.5 |
| A(5-33-36) | 107.8 | 107.7 | A(10-9-15) | 119.3 | 119.6 |
| A(7-6-11) | 115.2 | 114.6 | A(23-26-27) | 115.8 | 115.1 |
| A(7-6-15) | 125.3 | 125.3 |  |  |  |
| A(11-6-15) | 119.3 | 120.1 |  |  |  |
| A(6-15-17) | 134.3 | 133.9 |  |  |  |
| A(15-17-18) | 114.4 | 115.3 |  |  |  |
| A(17-18-19) | 118.9 | 119.5 |  |  |  |
| A(23-24-25) | 112.9 | 112.4 |  |  |  |
| A(23-24-32) | 125.5 | 124.8 |  |  |  |
| A(25-24-32) | 121.6 | 122.8 |  |  |  |
| A(24-25-26) | 111.6 | 111.3 |  |  |  |
| A(24-25-28) | 125.5 | 125.7 |  |  |  |
| A(26-25-28) | 122.9 | 122.9 |  |  |  |

**XYZ coordinates of the optimized geometry of 7**

S 0.888819000 2.240770000 0.000291000

S 1.442959000 -0.799663000 -0.000014000

O -1.106528000 -1.852519000 -0.000201000

O -3.059846000 -0.719537000 -0.000313000

O 3.987499000 -2.122314000 0.000190000

C -0.747498000 2.831682000 0.000216000

H -0.927271000 3.897802000 0.000214000

C -1.671494000 1.830022000 -0.000169000

C -1.043680000 0.522502000 -0.000245000

C 0.348086000 0.582179000 -0.000045000

C -3.150937000 2.109060000 -0.000394000

H -3.329055000 3.187725000 -0.001213000

H -3.639572000 1.676245000 0.876785000

H -3.639591000 1.674785000 -0.876747000

C -1.707322000 -0.789281000 -0.000258000

C -3.746456000 -1.992484000 -0.000239000

H -3.435191000 -2.561791000 0.880981000

H -3.436362000 -2.561248000 -0.882234000

C -5.236271000 -1.709539000 0.000795000

H -5.790883000 -2.652973000 0.000383000

H -5.529018000 -1.139752000 -0.885816000

H -5.528075000 -1.141058000 0.888549000

C 3.050487000 0.086248000 0.000019000

H 3.145877000 0.731478000 -0.882141000

H 3.145949000 0.731326000 0.882298000

C 4.192176000 -0.926009000 -0.000008000

C 5.592048000 -0.340986000 -0.000120000

H 6.322674000 -1.150538000 -0.000964000

H 5.744388000 0.291689000 0.881572000

H 5.743835000 0.293197000 -0.880806000

**XYZ coordinates of the optimized geometry of 8**

S 0.431191000 0.882713000 0.327294000

S 0.337692000 -2.150637000 0.014733000

O 3.689771000 -0.341203000 2.254218000

O -4.054842000 0.152895000 -0.289250000

O -2.292114000 1.532183000 -0.000865000

N 3.150573000 0.442112000 -1.649215000

C 1.995497000 0.671275000 -2.514160000

H 2.265723000 0.373343000 -3.530658000

H 1.696115000 1.725263000 -2.525396000

H 1.148319000 0.071090000 -2.188277000

C 4.449311000 0.531950000 -2.310379000

H 4.616779000 1.539742000 -2.711326000

H 4.504808000 -0.181323000 -3.140336000

H 5.245343000 0.306569000 -1.599960000

C 3.099995000 0.267111000 -0.317498000

H 4.066434000 0.041883000 0.131095000

C 2.088364000 0.293182000 0.620511000

C 2.529467000 -0.017018000 2.010995000

C 1.519678000 0.080617000 3.141636000

H 1.135014000 1.100748000 3.239288000

H 2.015713000 -0.215342000 4.066488000

H 0.656425000 -0.567642000 2.961689000

C -0.488619000 -0.615557000 0.065239000

C -1.856434000 -0.778483000 -0.128931000

C -2.238072000 -2.167074000 -0.315420000

C -1.158289000 -2.996281000 -0.259932000

H -1.149630000 -4.072999000 -0.360423000

C -3.639235000 -2.665647000 -0.543172000

H -4.297253000 -2.398837000 0.287931000

H -3.636141000 -3.753379000 -0.657208000

H -4.082093000 -2.218085000 -1.436978000

C -2.853676000 0.306964000 -0.150843000

C -3.210376000 2.648015000 0.005562000

H -3.948095000 2.492323000 0.798716000

H -3.752281000 2.663090000 -0.945402000

C -2.401032000 3.912125000 0.220593000

H -3.068404000 4.779626000 0.230715000

H -1.668584000 4.050584000 -0.579611000

H -1.866332000 3.877261000 1.173698000
